# Supplementary material for: Metabolic dysfunction modifies the influence of traffic-related air pollution and noise exposure on late-life dementia and cognitive impairment: A cohort study of older Mexican-Americans
Source: PubMed Central journal article supplement — Environ Epidemiol. 2020 Dec 3;4(6):e122. doi: 10.1097/EE9.0000000000000122 (PMC7941776; doi:10.1097/ee9.0000000000000122), 2020-12-03
Supplement: ee9-4-e122-s001.pdf [file ee9-4-e122-s001.pdf]

# **Metabolic Dysfunction Modifies the Influence of Traffic-Related Air Pollution and Noise Exposure on Late-life Dementia and Cognitive Impairment**

-A cohort study of older Mexican-Americans

## **Supplemental Tables**

**Table S1.** Definition of metabolic dysfunction according to the recommendations of the Third Adult Treatment Panel of the National Cholesterol Education Program (NCEP ATP III).

**Table S2.** Air pollutions and noise exposure measure means, variances, and distributions.

**Table S3.** Effect estimates (and 95% CI) of traffic-related NO<sub>x</sub> and 24-hour noise exposures (single exposure models) and each metabolic dysfunction on incident dementia/CIND from adjusted Cox proportional hazards regression models.

**Table S4.** Superadditivity and multiplicativity for joint effect analyses between traffic-related NO<sub>x</sub> (<3.44 vs ≥ 3.44 ppb) or 24-hour noise exposure (<65 vs ≥ 65 dB) and metabolic dysfunction on incident dementia/CIND.

**Table S5.** Joint effects for traffic-related NO<sub>x</sub> (<2.68 vs ≥ 2.68 ppb) or 24-hour noise exposure (<75 dB vs ≥ 75dB) and metabolic dysfunction on incident dementia/CIND.

**Table S6.** Effect estimates (and 95% CI) for traffic-related NO<sub>x</sub> and 24-hour noise exposures (single exposure models) and each metabolic dysfunction (defined without considering medication information) on incident dementia/CIND from adjusted Cox proportional hazards regression models.

**Table S7.** Joint effects between traffic-related NO<sub>x</sub> (<3.44 vs ≥ 3.44 ppb) or 24-hour noise (<65 vs ≥ 65 dB) exposure and metabolic dysfunction (defined without considering medication information) on incident dementia/CIND.

**Table S1. Definition of metabolic dysfunction according to the recommendations of the Third Adult Treatment Panel of the National Cholesterol Education Program (NCEP ATP III).**

| <b>Metabolic Dysfunction</b> | <b>NCEP ATP III Criteria</b>                                            |
|------------------------------|-------------------------------------------------------------------------|
| Abdominal Obesity            | Waist Circumference: $\geq 40$ inches (Male), $\geq 35$ inches (Female) |
| Hyperglycemia                | Fasting glucose $\geq 100$ mg/dl                                        |
| Low HDL-cholesterol          | HDL-Cholesterol: $< 40$ mg/dl (Male), $< 50$ mg/dl (Female)             |

Note: HDL, high density lipoprotein;

**Table S2. Air pollutions and noise exposure measure means, variances, and distributions.**

| Exposure                               | N    | Mean  | Variance | Percentile |          |           |           |           |           |           |           |            |
|----------------------------------------|------|-------|----------|------------|----------|-----------|-----------|-----------|-----------|-----------|-----------|------------|
|                                        |      |       |          | <i>0</i>   | <i>5</i> | <i>10</i> | <i>25</i> | <i>50</i> | <i>75</i> | <i>90</i> | <i>95</i> | <i>100</i> |
| Traffic-related NOx (ppb) <sup>a</sup> | 1612 | 2.59  | 4.69     | 0.01       | 0.43     | 0.67      | 1.15      | 1.90      | 3.34      | 5.22      | 6.93      | 13.20      |
| 24-hour noise (dB) <sup>a</sup>        | 1612 | 68.46 | 78.78    | 39.4       | 55.1     | 57.5      | 62.4      | 67.6      | 74.2      | 81.3      | 84.4      | 100.0      |

Note: NOx, nitrogen oxides; dB, decibels; ppb, part per billion.

a. The Pearson correlation among the air pollution and noise exposures estimates is 0.43.

**TableS3. Effect estimates (and 95% CI) of traffic-related NOx and 24-hour noise exposures (single exposure models) and each metabolic dysfunction on incident dementia/CIND from adjusted Cox proportional hazards regression models <sup>a</sup>.**

| Parameter                                       | Model 1        | Model 2         | Model 3         | Model 4         | Model 1        | Model 2         | Model 3        | Model 4         |
|-------------------------------------------------|----------------|-----------------|-----------------|-----------------|----------------|-----------------|----------------|-----------------|
|                                                 | HR (95% CI)    | HR (95% CI)     | HR (95% CI)     | HR (95% CI)     | HR (95% CI)    | HR (95% CI)     | HR (95% CI)    | HR (95% CI)     |
| Traffic-related NOx<br>(per 2.29 ppb increase)  | 1.2 (1.0, 1.4) | 1.2 (1.0, 1.4)  | 1.2 (0.98, 1.4) | 1.2 (0.99, 1.4) |                |                 |                |                 |
| 24-hour noise<br>(per 11.6 dB increase)         |                |                 |                 |                 | 1.2 (1.0, 1.5) | 1.2 (0.96, 1.5) | 1.2 (1.0, 1.5) | 1.2 (1.0, 1.5)  |
| Obesity (Yes vs No) <sup>b</sup>                |                | 1.1 (0.78, 1.6) |                 |                 |                | 1.1 (0.78, 1.6) |                |                 |
| Hyperglycemia (Yes vs No) <sup>b</sup>          |                |                 | 1.5 (1.0, 2.1)  |                 |                |                 | 1.5 (1.1, 2.1) |                 |
| Low HDL-cholesterol<br>(Yes vs No) <sup>b</sup> |                |                 |                 | 1.3 (0.91, 1.8) |                |                 |                | 1.3 (0.91, 1.8) |

Note: CIND, cognitive impairment without dementia; HDL, high density lipoprotein; dB, decibels; ppb, part per billion.

- a. All the models were adjusted with baseline age, sex, education, occupation held during most of the life, neighborhood socio-economic status, smoking status, alcohol status, residential county, physical activity and household income, baseline cognition function.
- b. Definitions for metabolic dysfunction: (i) obesity: waist circumference of  $\geq 40$  in. in men;  $\geq 35$  in. in women; (ii) hyperglycemia: fasting glucose  $\geq 100$  mg/dl, or use of glucose-lowering medications; (iii) low HDL cholesterol: men:  $< 40$  mg/dl; women:  $< 50$  mg/dl, or use of statins.

**Table S4. Superadditivity and multiplicativity for joint effect analyses <sup>a</sup> between traffic-related NO<sub>x</sub> (<3.44 vs ≥ 3.44 ppb) or 24-hour noise exposure (<65 vs ≥ 65 dB) and metabolic dysfunction on incident dementia/CIND.**

| Risk factor                             | Traffic-related NO <sub>x</sub><br>(<3.44 vs ≥ 3.44 ppb) |                                                        |                       | 24-hour noise<br>(<65 vs ≥ 65 dB)         |                                                        |                       |
|-----------------------------------------|----------------------------------------------------------|--------------------------------------------------------|-----------------------|-------------------------------------------|--------------------------------------------------------|-----------------------|
|                                         | <i>Superadditivity</i><br>( <i>RERI</i> )                | <i>Multiplicativity</i><br>( <i>Interaction term</i> ) |                       | <i>Superadditivity</i><br>( <i>RERI</i> ) | <i>Multiplicativity</i><br>( <i>Interaction term</i> ) |                       |
|                                         | <b>RERI (95% CI)</b>                                     | <b>HR (95% CI)</b>                                     | <b><i>p</i>-value</b> | <b>RERI (95% CI)</b>                      | <b>HR (95% CI)</b>                                     | <b><i>p</i>-value</b> |
| <i>Obesity</i> <sup>b</sup>             | 0.20 (-0.81, 1.2)                                        | 1.2 (0.51, 2.7)                                        | 0.72                  | -0.11 (-1.1, 0.90)                        | 0.87 (0.39, 1.9)                                       | 0.74                  |
| <i>Hyperglycemia</i> <sup>b</sup>       | 0.50 (-0.52, 1.5)                                        | 1.4 (0.6, 3.3)                                         | 0.40                  | 0.32 (-0.54, 1.2)                         | 0.99 (0.46, 2.1)                                       | 0.97                  |
| <i>Low HDL-cholesterol</i> <sup>b</sup> | 1.1 (0.03, 2.1)                                          | 2.2 (1.0, 4.8)                                         | 0.05                  | -0.01 (-0.93, 0.90)                       | 0.88 (0.42, 1.9)                                       | 0.74                  |

Note: CIND, cognitive impairment without dementia; HDL, high density lipoprotein; NO<sub>x</sub>, nitrogen oxides; dB, decibels; ppb, part per billion; HR, hazard ratio; 95% CI, 95% confidence interval, RERI, relative excess risk due to interaction.

- a. All the models were adjusted with baseline age, sex, education, occupation held during most of the life, neighborhood socio-economic status, smoking status, alcohol status, residential county, physical activity and household income, baseline cognition function.
- b. Definitions for metabolic dysfunction: (i) obesity: waist circumference of ≥40 in. in men; ≥35 in. in women; (ii) hyperglycemia: fasting glucose ≥100 mg/dl, or use of glucose-lowering medications; (iii) low HDL cholesterol: men:<40 mg/dl; women:<50 mg/dl, or use of statins.

**Table S5. Joint effects <sup>a</sup> for traffic-related NOx (<2.68 vs ≥ 2.68 ppb) or 24-hour noise exposure (<75 dB vs ≥ 75dB) and metabolic dysfunction on incident dementia/CIND.**

| Risk Factor                                    | Traffic-related NOx |      |              |                |                   |              | 24-hour noise        |      |              |                      |                   |              |
|------------------------------------------------|---------------------|------|--------------|----------------|-------------------|--------------|----------------------|------|--------------|----------------------|-------------------|--------------|
|                                                | NOx <2.68 ppb       |      |              | NOx ≥ 2.68 ppb |                   |              | 24-hour noise < 75dB |      |              | 24-hour noise ≥ 75dB |                   |              |
|                                                | Case/Total          | HR   | 95% CI       | Case/Total     | HR                | 95% CI       | Case/Total           | HR   | 95% CI       | Case/Total           | HR                | 95% CI       |
| <b><i>Obesity <sup>b</sup></i></b>             |                     |      |              |                |                   |              |                      |      |              |                      |                   |              |
| No                                             | 33/400              | 1.00 | -            | 18/207         | 1.25              | (0.67, 2.32) | 40/466               | 1.00 | -            | 11/141               | 1.07              | (0.52, 2.18) |
| Yes                                            | 62/589              | 1.15 | (0.70, 1.88) | 32/312         | 1.59 <sup>c</sup> | (0.92, 2.73) | 65/696               | 1.05 | (0.67, 1.64) | 29/205               | 1.79 <sup>c</sup> | (1.05, 3.06) |
| <b><i>Hyperglycemia <sup>b</sup></i></b>       |                     |      |              |                |                   |              |                      |      |              |                      |                   |              |
| No                                             | 52/581              | 1.00 | -            | 21/259         | 1.01              | (0.55, 1.87) | 48/648               | 1.00 | -            | 25/192               | 1.72              | (0.95, 3.12) |
| Yes                                            | 51/481              | 1.41 | (0.89, 2.23) | 35/291         | 2.09 <sup>c</sup> | (1.29, 3.40) | 66/594               | 1.79 | (1.16, 2.76) | 20/178               | 2.35 <sup>c</sup> | (1.34, 4.13) |
| <b><i>Low HDL-Cholesterol <sup>b</sup></i></b> |                     |      |              |                |                   |              |                      |      |              |                      |                   |              |
| No                                             | 62/671              | 1.00 | -            | 32/355         | 1.29              | (0.78, 2.11) | 64/788               | 1.00 | -            | 30/238               | 1.79              | (1.07, 3.00) |
| Yes                                            | 41/391              | 1.31 | (0.83, 2.07) | 24/195         | 1.85 <sup>c</sup> | (1.08, 3.18) | 50/454               | 1.53 | (0.99, 2.34) | 15/132               | 1.76 <sup>c</sup> | (0.96, 3.23) |

Note: CIND, cognitive impairment without dementia; HDL, high density lipoprotein; NOx, nitrogen oxides; dB, decibels; ppb, part per billion; HR, hazard ratio; 95% CI, 95% confidence interval.

- a. All the models were adjusted with baseline age, sex, education, occupation held during most of the life, neighborhood socio-economic status, smoking status, alcohol status, residential county, physical activity and household income, baseline cognition function.
- b. Definitions for metabolic dysfunction: (i) obesity: waist circumference of ≥40 in. in men; ≥35 in. in women; (ii) hyperglycemia: fasting glucose ≥100 mg/dl, or use of glucose-lowering medications; (iii) low HDL cholesterol: men:<40 mg/dl; women:<50 mg/dl, or use of statins.

**Table S6. Effect estimates (and 95% CI) for traffic-related NOx and 24-hour noise exposures (single exposure models) and each metabolic dysfunction (defined without considering medication information) on incident dementia/CIND from adjusted Cox proportional hazards regression models <sup>a</sup>.**

| Parameter                                       | Model 1        | Model 2         | Model 3         | Model 4         | Model 1        | Model 2         | Model 3         | Model 4         |
|-------------------------------------------------|----------------|-----------------|-----------------|-----------------|----------------|-----------------|-----------------|-----------------|
|                                                 | HR (95% CI)    | HR (95% CI)     | HR (95% CI)     | HR (95% CI)     | HR (95% CI)    | HR (95% CI)     | HR (95% CI)     | HR (95% CI)     |
| Traffic-related NOx<br>(per 2.29 ppb increase)  | 1.2 (1.0, 1.4) | 1.2 (1.0, 1.4)  | 1.2 (0.98, 1.4) | 1.2 (0.99, 1.4) |                |                 |                 |                 |
| 24-hour noise<br>(per 11.6 dB increase)         |                |                 |                 |                 | 1.2 (1.0, 1.5) | 1.2 (0.96, 1.5) | 1.2 (0.97, 1.5) | 1.2 (0.96, 1.5) |
| Obesity (Yes vs No) <sup>b</sup>                |                | 1.1 (0.78, 1.6) |                 |                 |                | 1.1 (0.78, 1.6) |                 |                 |
| Hyperglycemia (Yes vs No) <sup>b</sup>          |                |                 | 1.6 (1.1, 2.2)  |                 |                |                 | 1.6 (1.1, 2.2)  |                 |
| Low HDL-cholesterol<br>(Yes vs No) <sup>b</sup> |                |                 |                 | 1.4 (0.97, 2.0) |                |                 |                 | 1.4 (0.96, 2.0) |

Note: CIND, cognitive impairment without dementia; HDL, high density lipoprotein; NOx, nitrogen oxides; dB, decibels; ppb, part per billion; HR, hazard ratio; 95% CI, 95% confidence interval.

- a. All the models were adjusted with baseline age, sex, education, occupation held during most of the life, neighborhood socio-economic status, smoking status, alcohol status, residential county, physical activity and household income, baseline cognition function.
- b. Definitions for metabolic dysfunction: (i) obesity: waist circumference of  $\geq 40$  in. in men;  $\geq 35$  in. in women; (ii) hyperglycemia: fasting glucose  $\geq 100$  mg/dl; (iii) low HDL cholesterol: men:  $< 40$  mg/dl; women:  $< 50$  mg/dl.

**Table S7. Joint effects <sup>a</sup> between traffic-related NO<sub>x</sub> (<3.44 vs ≥ 3.44 ppb) or 24-hour noise (<65 vs ≥ 65 dB) exposure and metabolic dysfunction (defined without considering medication information) on incident dementia/CIND.**

| Risk Factor                                    | Traffic-related NO <sub>x</sub> |      |              |                            |                   |              | 24-hour noise     |      |              |                   |                   |              |
|------------------------------------------------|---------------------------------|------|--------------|----------------------------|-------------------|--------------|-------------------|------|--------------|-------------------|-------------------|--------------|
|                                                | NO <sub>x</sub> <3.44 ppb       |      |              | NO <sub>x</sub> ≥ 3.44 ppb |                   |              | 24hr noise < 65dB |      |              | 24hr noise ≥ 65dB |                   |              |
|                                                | Case/Total                      | HR   | 95% CI       | Case/Total                 | HR                | 95% CI       | Case/Total        | HR   | 95% CI       | Case/Total        | HR                | 95% CI       |
| <b><i>Obesity <sup>b</sup></i></b>             |                                 |      |              |                            |                   |              |                   |      |              |                   |                   |              |
| No                                             | 38/463                          | 1.00 | -            | 13/144                     | 1.31              | (0.67, 2.58) | 16/226            | 1.00 | -            | 35/381            | 1.45              | (0.76, 2.78) |
| Yes                                            | 69/678                          | 1.14 | (0.72, 1.80) | 25/223                     | 1.73 <sup>c</sup> | (0.99, 3.03) | 31/339            | 1.31 | (0.67, 2.53) | 63/562            | 1.65 <sup>c</sup> | (0.89, 3.07) |
| <b><i>Hyperglycemia <sup>b</sup></i></b>       |                                 |      |              |                            |                   |              |                   |      |              |                   |                   |              |
| No                                             | 51/614                          | 1.00 | -            | 12/168                     | 1.07              | (0.54, 2.09) | 19/303            | 1.00 | -            | 44/479            | 1.29              | (0.73, 2.29) |
| Yes                                            | 54/519                          | 1.45 | (0.95, 2.22) | 27/200                     | 2.42 <sup>c</sup> | (1.44, 4.04) | 26/256            | 1.60 | (0.87, 2.95) | 55/463            | 2.21 <sup>c</sup> | (1.27, 3.85) |
| <b><i>Low HDL-Cholesterol <sup>b</sup></i></b> |                                 |      |              |                            |                   |              |                   |      |              |                   |                   |              |
| No                                             | 69/756                          | 1.00 | -            | 18/256                     | 0.97              | (0.55, 1.69) | 29/383            | 1.00 | -            | 58/629            | 1.31              | (0.80, 2.14) |
| Yes                                            | 37/379                          | 1.13 | (0.73, 1.77) | 21/112                     | 2.85 <sup>c</sup> | (1.65, 4.91) | 17/178            | 1.48 | (0.79, 2.75) | 41/313            | 1.89 <sup>c</sup> | (1.12, 3.20) |

Note: CIND, cognitive impairment without dementia; HDL, high density lipoprotein; NO<sub>x</sub>, nitrogen oxides; dB, decibels; ppb, part per billion; HR, hazard ratio; 95% CI, 95% confidence interval.

- a. All the models were adjusted with baseline age, sex, education, occupation held during most of the life, neighborhood socio-economic status, smoking status, alcohol status, residential county, physical activity and household income, baseline cognition function.
- b. Definitions for metabolic dysfunction: (i) obesity: waist circumference of ≥40 in. in men; ≥35 in. in women; (ii) hyperglycemia: fasting glucose ≥100 mg/dl; (iii) low HDL cholesterol: men:<40 mg/dl; women:<50 mg/dl.
